# Supplementary material
Source: PubMed Central journal article supplement (PMC3281737)
Supplement: supp_M111.303156_jbc.M111.303156-2.pdf [file supp_M111.303156_jbc.M111.303156-2.pdf]

## Supplementary Figure S1

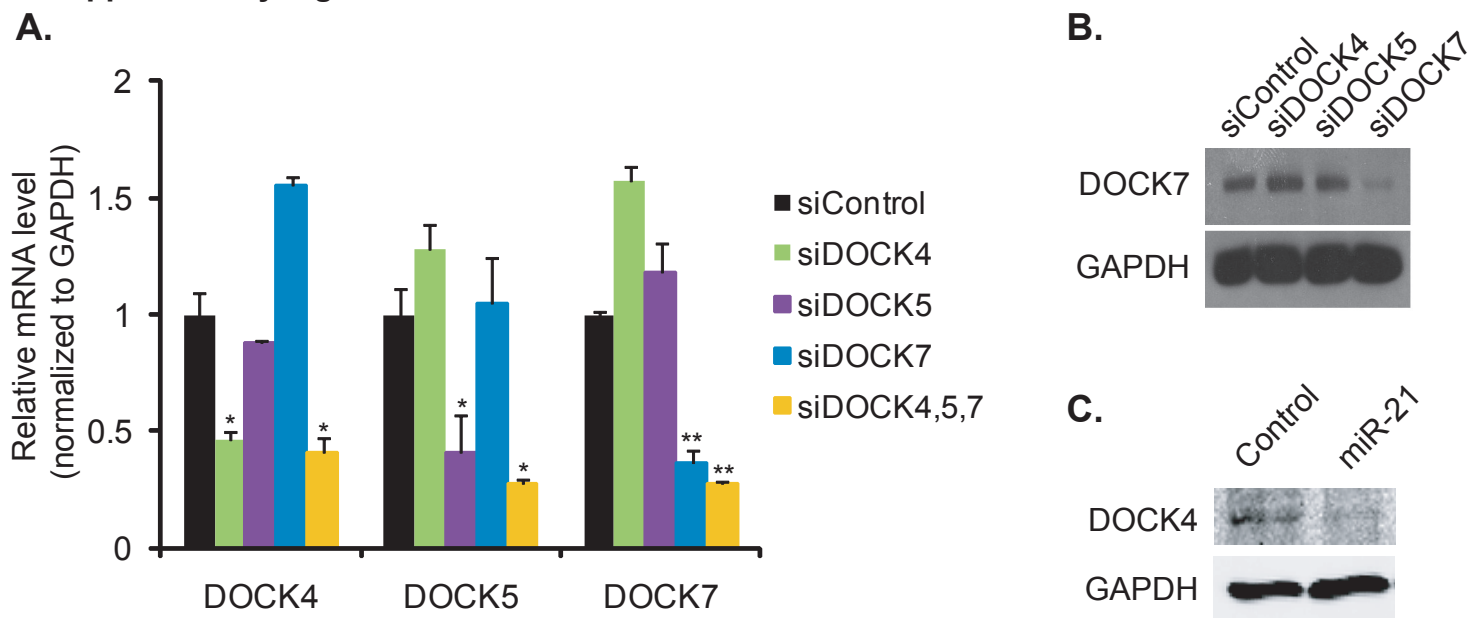

**Fig. S1. siDOCK7 specifically downregulates DOCK7 protein level in PSMCs.** Total cell lysates were generated in PSMCs transfected with 25nM non-targeting control siRNA (siControl), siDOCK4, siDOCK5, or siDOCK7 and subjected to qRT-PCR analysis of DOCK4, 5, or 7 mRNA expression (**A**) or immunoblot analysis using rabbit polyclonal anti-DOCK7 antibodies (**B**). Data represent mean  $\pm$  SEM. \* $p < 0.01$ ; \*\* $p < 0.0001$ . (**C**) PSMCs were transfected with control or miR-21 mimic and total cell lysates were subjected to immunoblot analysis using a rabbit polyclonal anti-DOCK4 antibody.
